# Supplementary material for: Performance of a fully‐automated system on a WHO malaria microscopy evaluation slide set
Source: PubMed Central journal article supplement (PMC7905596; doi:10.1186/s12936-021-03631-3), 2021-02-25
Supplement: 12936_2021_3631_MOESM2_ESM.pdf [file 12936_2021_3631_MOESM2_ESM.pdf]

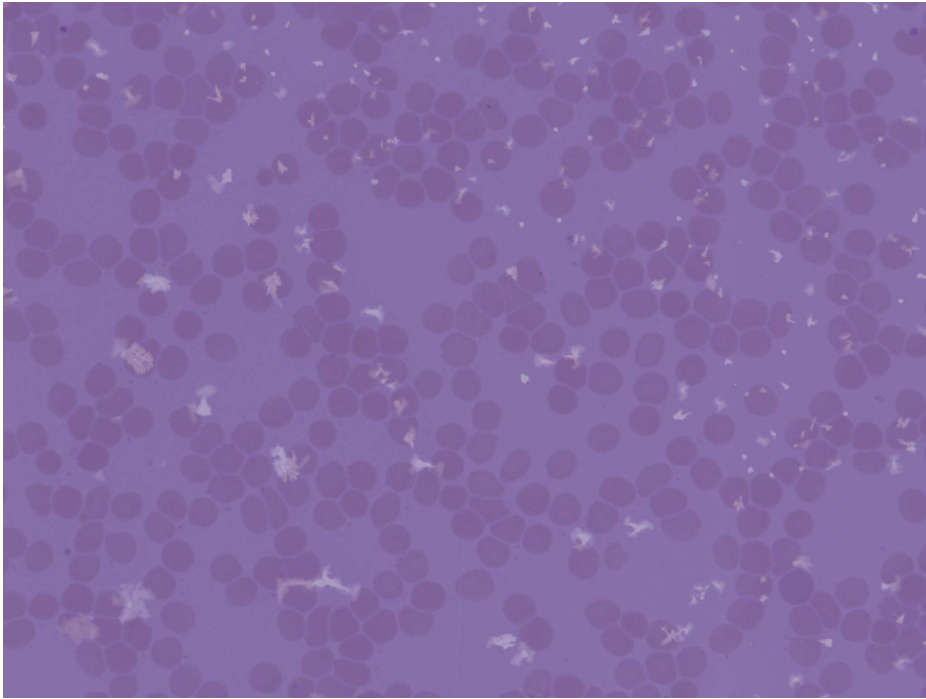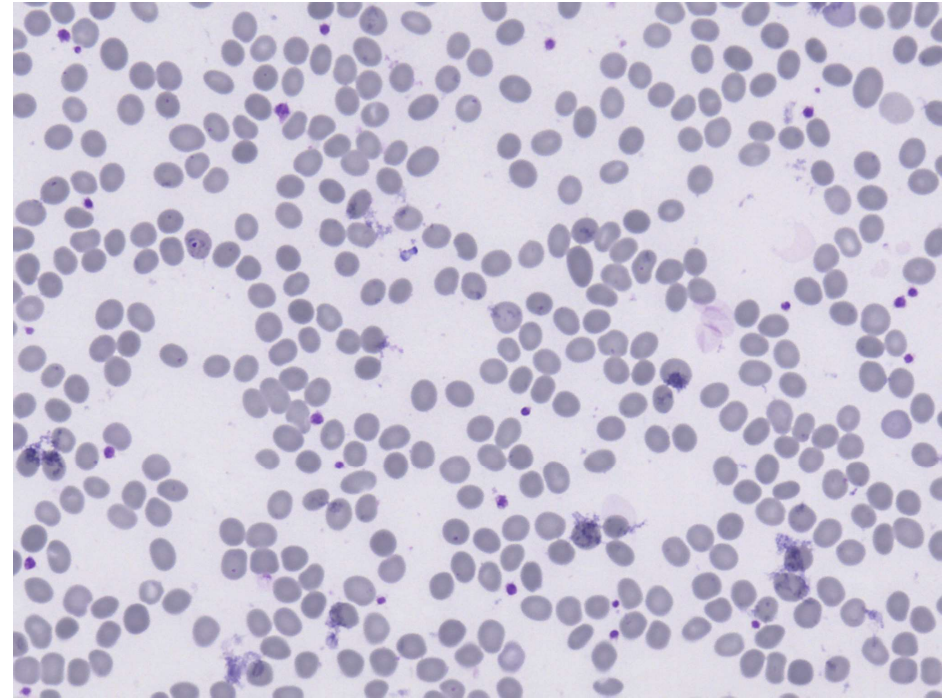

Additional File 2: Example field of view from the thin film rejected by the EasyScan Go malaria detector (left), and an example of a typical thin film field of view (right).
